# Supplementary material
Source: PubMed Central journal article supplement (PMC7431793)
Supplement: JVI.01175-20-s0001.pdf [file JVI.01175-20-s0001.pdf]

# Supplemental Figures

(A)

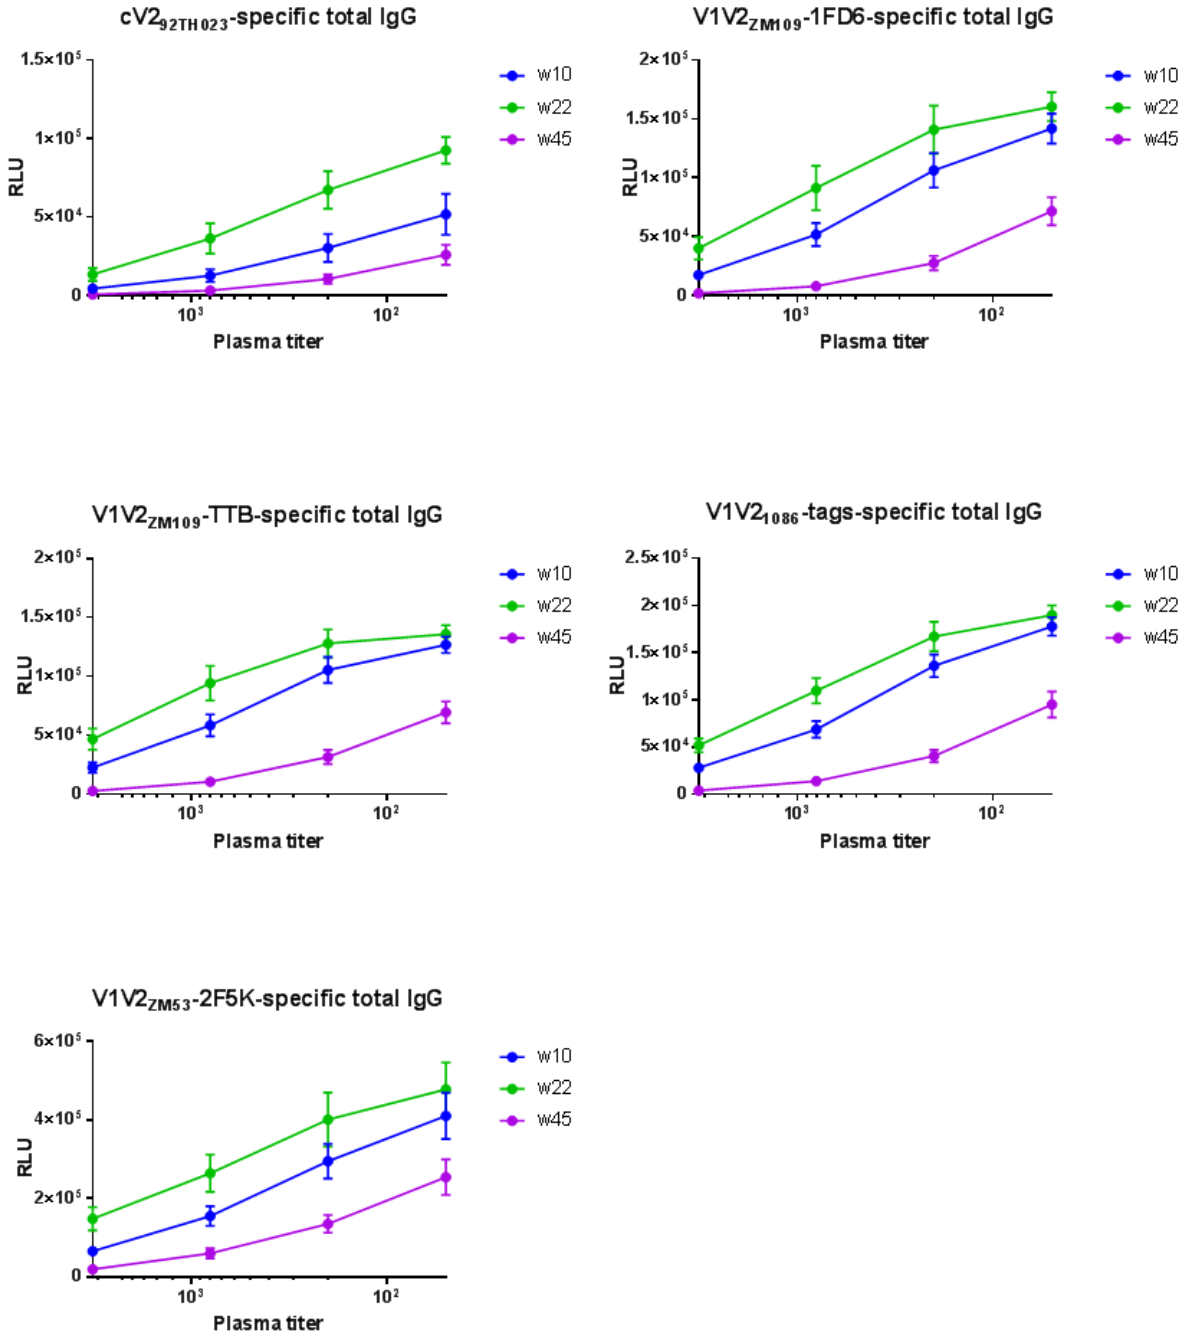

(B)

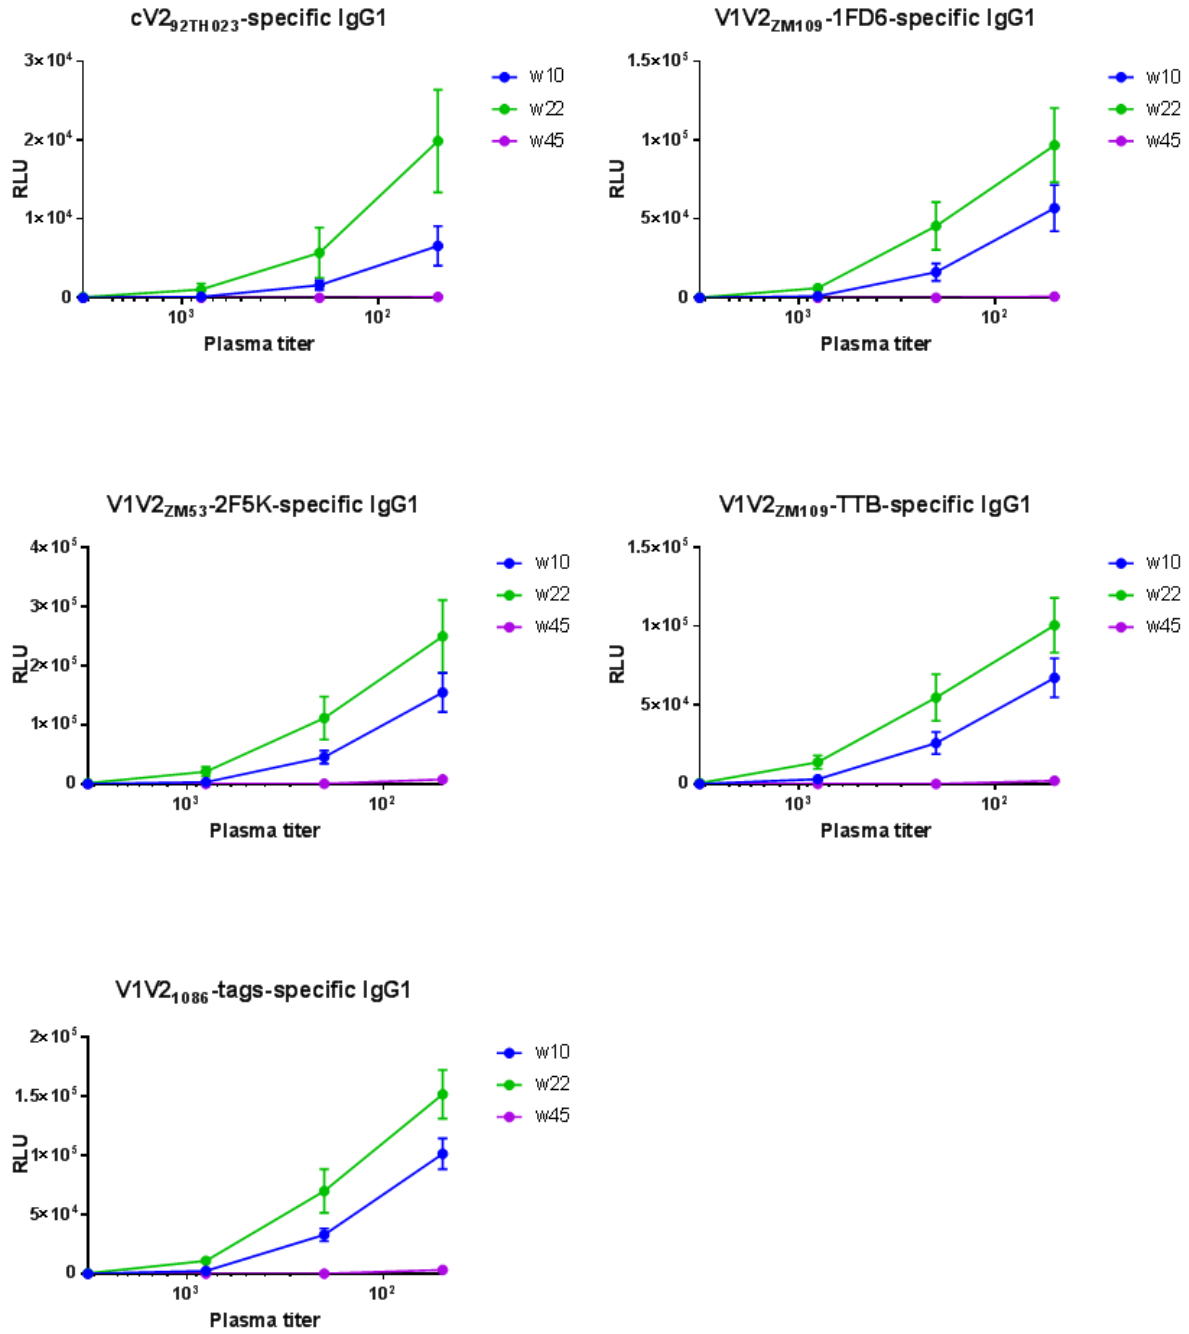

(C)

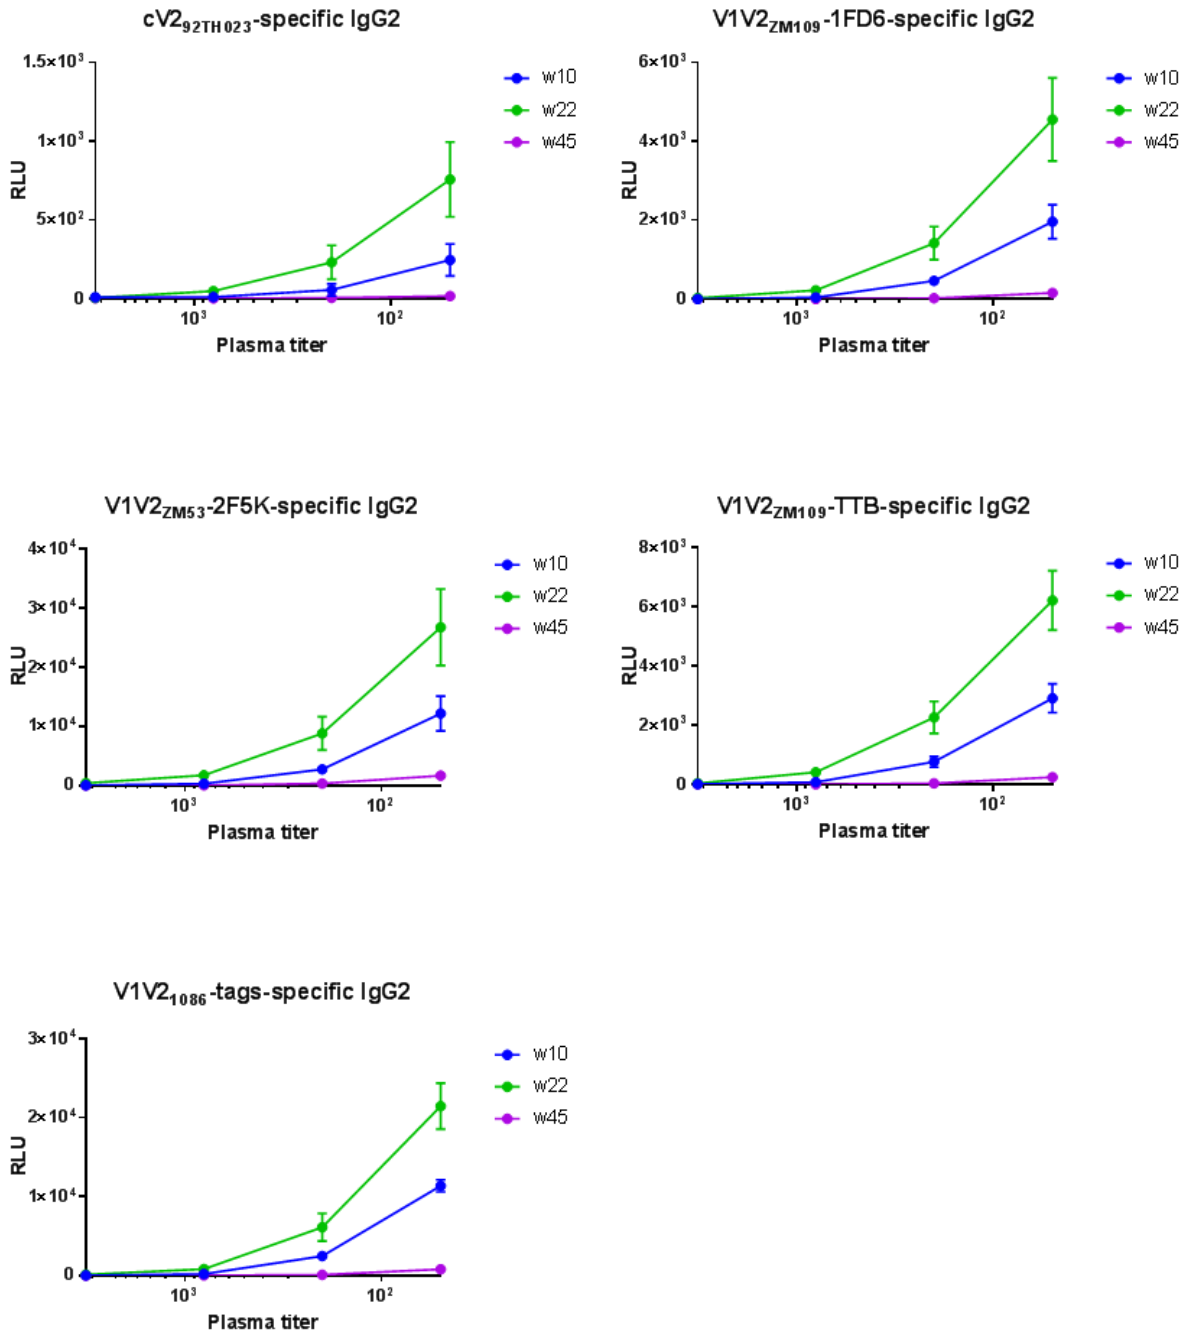

(D)

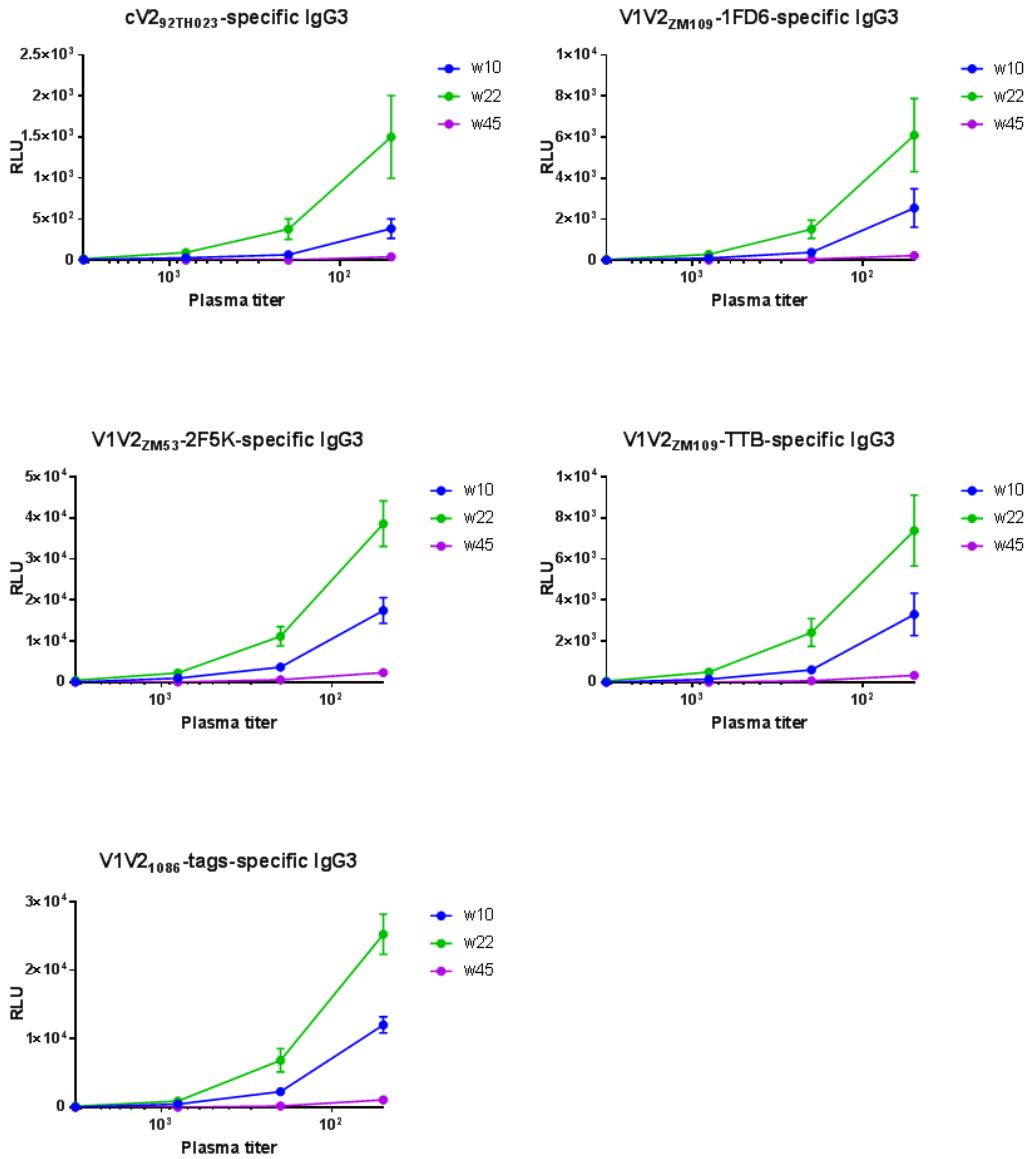

**Supplemental Figure 1: Plasma IgG binding to various V2 antigens.** Data were generated simultaneously using a Luminex multiplex assay for binding of immune NHP plasma against six antigen-coupled bead types with plasma from each time point. BSA-coated beads and pre-bleed NHP plasma were used as negative controls. (A) Total IgG. (B) IgG1. (C) IgG2. (D) IgG3. Each isotype was measured separately.
